# Supplementary material for: Spontaneous alloying of ultrasmall non-stoichiometric Ag–In–S and Cu–In–S quantum dots in aqueous colloidal solutions
Source: Royal Society of Chemistry journal article supplement (doi:10.1039/d1ra03179a), 2021-01-01
Supplement: d1ra03179a1.pdf [file d1ra03179a1.pdf]

## Supporting Information

# Spontaneous Alloying of Ultrasmall Non-Stoichiometric Ag-In-S and Cu-In-S Quantum Dots in Aqueous Colloidal Solutions

Oleksandr Stroyuk<sup>1,2\*</sup>, Oleksandra Raievska<sup>2,3,4</sup>, Dmytro Solonenko<sup>3,4</sup>, Christian Kupfer<sup>5</sup>, Andres Osvet<sup>5</sup>, Miroslaw Batentschuk<sup>5</sup>, Christoph J. Brabec<sup>1,5</sup>, Dietrich R.T. Zahn<sup>3,4</sup>

<sup>1</sup>Forschungszentrum Jülich GmbH, Helmholtz-Institut Erlangen Nürnberg für Erneuerbare Energien (HI ERN), 91058 Erlangen, Germany

<sup>2</sup>L.V. Pysarzhevsky Institute of Physical Chemistry, Nat. Acad. of Science of Ukraine, 03028 Kyiv, Ukraine

<sup>3</sup>Semiconductor Physics, Chemnitz University of Technology, D-09107 Chemnitz, Germany

<sup>4</sup>Center for Materials, Architectures, and Integration of Nanomembranes (MAIN), Chemnitz University of Technology, D-09107 Chemnitz, Germany

<sup>5</sup>Friedrich-Alexander-Universität Erlangen-Nürnberg, Materials for Electronics and Energy Technology (i-MEET), Martensstrasse 7, 91058 Erlangen, Germany

### Authors for correspondence:

\*Dr. Oleksandr Stroyuk, Forschungszentrum Jülich GmbH, Helmholtz-Institut Erlangen Nürnberg für Erneuerbare Energien (HI ERN), Immerwahrstr. 2, 91058 Erlangen, Germany; *e-mail*: o.stroyuk@fz-juelich.de, alstroyuk@ukr.net.

**Table S1.** XRD peak positions, FWHMs, and average size  $d$  of QDs estimated using the Scherrer equation from the parameters of (220) and (312) peaks

| QD type | 2 $\theta$ /FWHM (112) | 2 $\theta$ /FWHM (220) | 2 $\theta$ /FWHM (312) | $d$ , nm      |
|---------|------------------------|------------------------|------------------------|---------------|
| AIS     | 26.93/4.76             | 45.17/4.27             | 52.72/4.40             | 2.0 $\pm$ 0.1 |
| CIS     | 27.52/6.03             | 46.60/4.66             | 54.35/4.20             | 1.8 $\pm$ 0.1 |
| CAIS    | 27.32/6.04             | 46.06/4.36             | 53.68/4.54             | 2.0 $\pm$ 0.1 |

|         |            |            |            |           |
|---------|------------|------------|------------|-----------|
| AIS+CIS | 27.09/5.88 | 45.77/4.36 | 53.28/4.56 | 2.0 ± 0.1 |
|---------|------------|------------|------------|-----------|

**Table S2.** Evolution of PL parameters of the 1:1 concentrated mixture of colloidal CIS and AIS QDs kept at 25 °C for different times

| Time,<br>min | $E_{PL}$ ,<br>eV | $I_{PL}$ ,<br>arb. un. | $w_{PL}$ ,<br>meV |
|--------------|------------------|------------------------|-------------------|
| 3            | 2.00             | 100                    | 325               |
| 9            | 1.99             | 98                     | 320               |
| 15           | 1.99             | 95                     | 320               |
| 80           | 1.98             | 77                     | 335               |
| 180          | 1.98             | 52                     | 345               |
| 360          | 1.95             | 41                     | 365               |

Notes: determination uncertainty is 0.01 eV for  $E_{PL}$ , 1 for  $I_{PL}$ , 5 meV for  $w_{PL}$ .

**Table S3.** Evolution of PL parameters of the 1:1 mixture of colloidal CIS and AIS QDs diluted by a factor of 1000 and kept at 25 °C for different times

| Time,<br>min | $E_{PL}$ ,<br>eV | $I_{PL}$ ,<br>arb. un. | $w_{PL}$ ,<br>meV |
|--------------|------------------|------------------------|-------------------|
| 4            | 2.0              | 100                    | 320               |
| 11           | 1.99             | 91                     | 320               |
| 15           | 1.99             | 83                     | 325               |
| 32           | 1.98             | 82                     | 330               |
| 82           | 1.98             | 78                     | 330               |
| 108          | 1.97             | 77                     | 335               |
| 134          | 1.97             | 76                     | 335               |
| 300          | 1.96             | 66                     | 345               |

Notes: determination uncertainty is 0.01 eV for  $E_{PL}$ , 1 for  $I_{PL}$ , 5 meV for  $w_{PL}$ .

**Table S4.** Evolution of PL parameters of the 1:1 concentrated mixture of colloidal CIS and AIS QDs kept at 96-98 °C for different times

| Time, min | $E_{PL}$ , eV | $I_{PL}$ , arb. un. | $w_{PL}$ , meV |
|-----------|---------------|---------------------|----------------|
| 1         | 1.98          | 100                 | 340            |
| 2         | 1.92          | 51                  | 380            |
| 6         | 1.85          | 43                  | 345            |
| 9         | 1.83          | 39                  | 335            |
| 12        | 1.81          | 35                  | 330            |
| 15        | 1.80          | 33                  | 330            |
| 18        | 1.79          | 32                  | 325            |
| 21        | 1.77          | 26                  | 320            |

Notes: determination uncertainty is 0.01 eV for  $E_{PL}$ , 1 for  $I_{PL}$ , 5 meV for  $w_{PL}$ .

**Table S5.** Evolution of PL parameters of the 1:1 mixture of colloidal CIS and AIS QDs diluted by a factor of 1000 and kept at 96-98 °C for different times

| Time, min | $E_{PL}$ , eV | $I_{PL}$ , arb. un. | $w_{PL}$ , meV |
|-----------|---------------|---------------------|----------------|
| 1         | 1.99          | 100                 | 360            |
| 4         | 1.93          | 97                  | 360            |
| 7         | 1.91          | 95                  | 355            |
| 10        | 1.89          | 94                  | 350            |
| 15        | 1.87          | 85                  | 340            |
| 20        | 1.85          | 84                  | 330            |
| 25        | 1.84          | 82                  | 320            |
| 30        | 1.83          | 73                  | 320            |
| 40        | 1.81          | 67                  | 315            |
| 60        | 1.79          | 52                  | 310            |

Notes: determination uncertainty is 0.01 eV for  $E_{PL}$ , 1 for  $I_{PL}$ , 5 meV for  $w_{PL}$ .

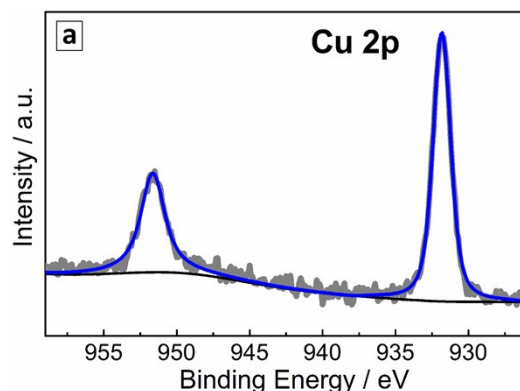

**Figure S1.** (a) X-ray photoelectron spectrum of GSH-capped CIS QDs in the range of copper 2p electron binding energies (gray solid line). Black line is a baseline, blue solid line - fitting of the experimental spectrum.

*Description of the XPS setup and fitting procedure.* XPS studies were performed using an ESCALAB™ 250Xi X-ray Photoelectron Spectrometer Microprobe (Thermo Scientific). For XPS measurements the colloids were drop-casted on Au/Si substrate and dried under vacuum. The spectra were acquired under excitation of a 650  $\mu\text{m}$  spot with a monochromized Al  $K_{\alpha}$  (1486.6 eV) X-ray source and a pass energy of 20 eV (spectral resolution of 0.5 eV). During the XPS measurement, the sample was flooded with low kinetic energy (about 0.1 eV) electrons to prevent possible charging. Spectra deconvolution and quantification were performed using the Thermo Scientific™ Avantage Software. The authors thankfully acknowledge Dr. Volodymyr Dzhagan (TU Chemnitz) for his help in acquiring XPS spectra.

*Analysis of the XPS copper 2p range.* The copper 2p range shows a doublet at 931.8/951.7 eV (Fig. 2c). The positions of peaks and the distance between them (19.9 eV), indicate that copper is present in the sample solely as Cu(I) typically found in metal sulfides [1-4]. Additionally, the absence of any features around 934/954 eV as well as any satellite peaks of paramagnetic  $\text{Cu}^{2+}$  species at 940-945 eV confirm that copper is present in the GSH-capped CIS/ZnS NCs as Cu(I) [1-4].

#### *References.*

- [1]. A. V. Naumkin, A. Kraut-Vass, S. W. Gaarenstroom, NIST X-ray Photoelectron Spectroscopy Database, NIST, Stand. Ref. Database 20, Version 4.1. (2012).
- [2]. G.H. Czerlinski, A.S.D.H.A. Fiess, A Mixed-valence Copper Complex with Thiol Compounds, *J. Am. Chem. Soc.* 1 (1958) 2920–2923.
- [3]. M.P. Briggs, D. and Seah, *Practical Surface Analysis by Auger and X-Ray Photoelectron*

Spectroscopy, John Wiley & Sons, Chichester, 1983.

[4]. T.J. Whittles, Electronic Characterisation of Earth-Abundant Sulphides for Solar Photovoltaics, Springer International Publishing, 2018.

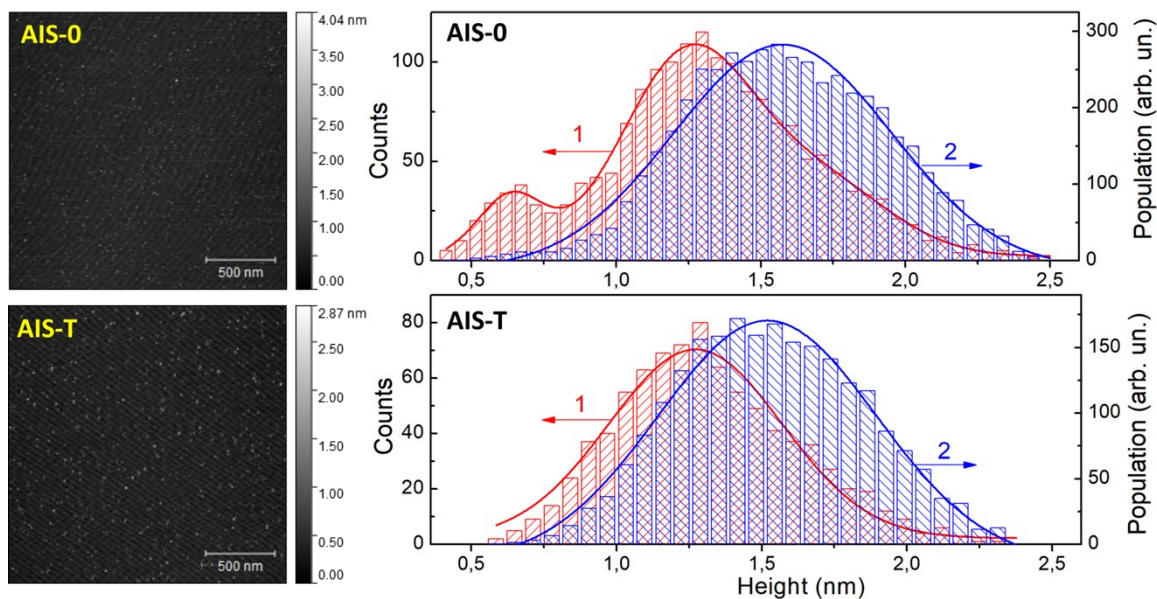

**Figure S2.** AFM images (left panel) and size distributions (right panel) of aqueous colloidal GSH-capped AIS QDs kept at room temperature (AIS-0) and at 96-98 °C (AIS-T). QD size (height) distributions are numerical (1) and volumetric (2).

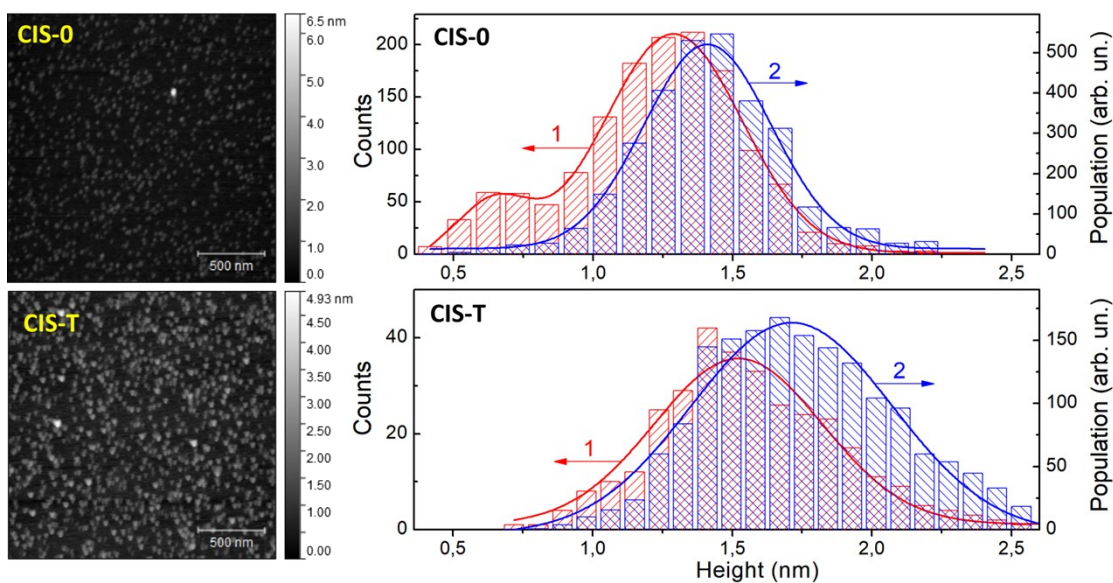

**Figure S3.** AFM images (left panel) and size distributions (right panel) of aqueous colloidal

GSH-capped CIS QDs kept at room temperature (CIS-0) and at 96-98 °C (CIS-T). QD size (height) distributions are numerical (1) and volumetric (2).

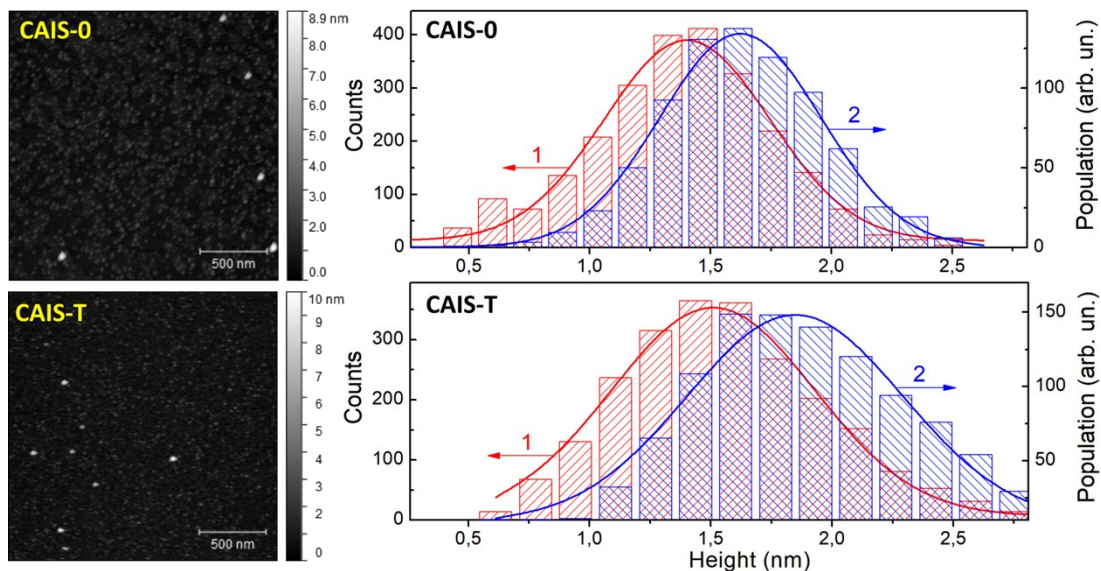

**Figure S4.** AFM images (left panel) and size distributions (right panel) of aqueous colloidal GSH-capped CAIS QDs (Cu:Ag = 1:1) kept at room temperature (CAIS-0) and at 96-98 °C (CAIS-T). QD size (height) distributions are numerical (1) and volumetric (2).

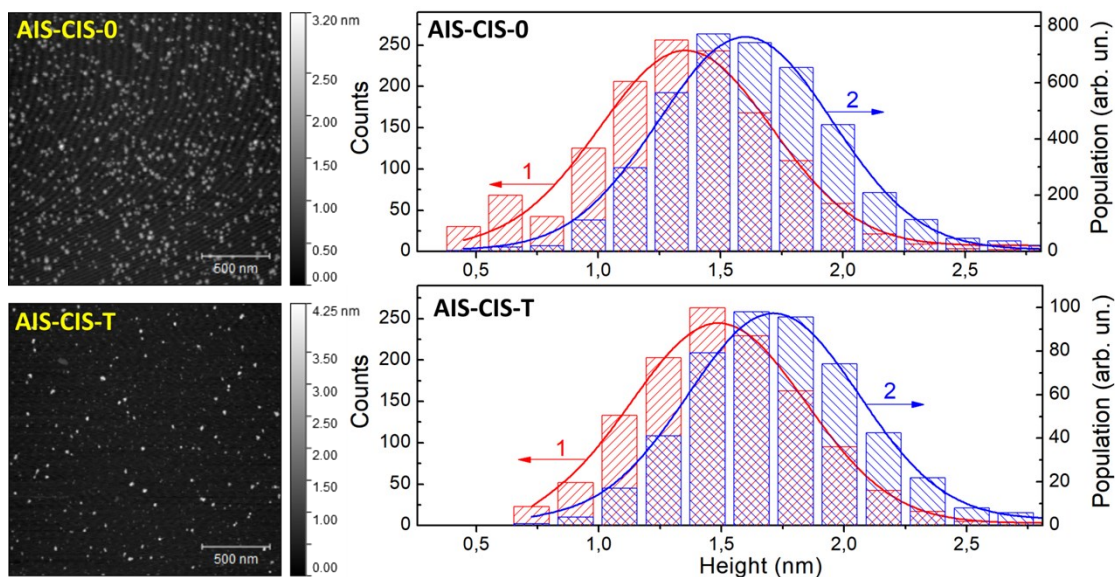

**Figure S5.** AFM images (left panel) and size distributions (right panel) of a mixture of aqueous colloidal GSH-capped AIS and CIS QDs (AIS:CIS = 1:1 v/v) kept at room temperature (AIS-CIS-0) and at 96-98 °C (AIS-CIS-T). QD size (height) distributions are numerical (1) and volumetric (2).



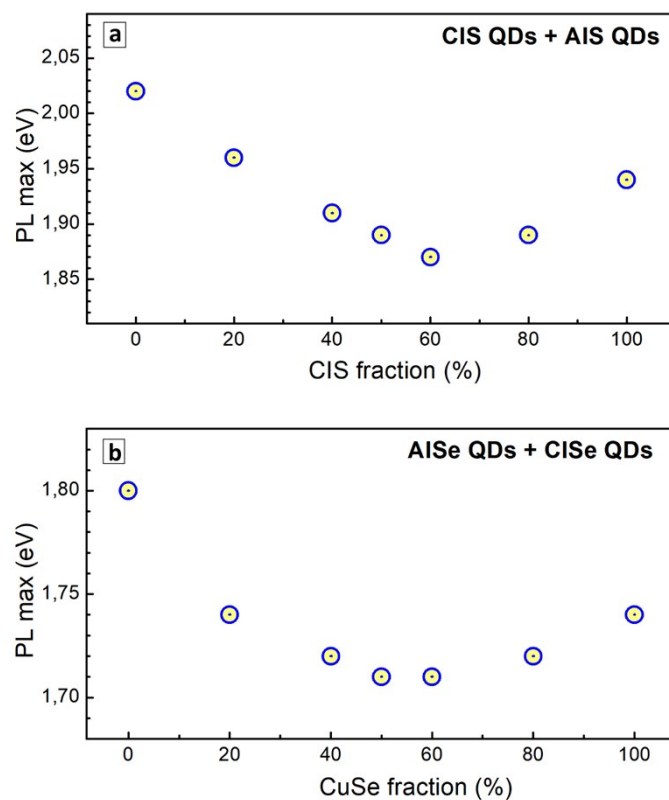

**Figure S6.** PL band maximum position of the products of spontaneous alloying of aqueous CIS and AIS QDs (a) and aqueous CISe and AISe QDs (b) at room temperature for 24 h.
